# Supplementary material for: Making sense of variation in sclerochronological stable isotope profiles of mollusks and fish otoliths from the early Eocene southern North Sea Basin
Source: Copernicus journal article supplement (doi:10.5194/egusphere-2024-298), 2024-02-22
Supplement: Supplementary file 1 [file egusphere-2024-298-supplement.pdf]

All isotope values in ‰ VPDB, see text for taxonomy, stratigraphy and microsampling methodology

| Sampling      |                                                                                             |      |      |                   |       |                   |       |
|---------------|---------------------------------------------------------------------------------------------|------|------|-------------------|-------|-------------------|-------|
| Otoliths      | A: Distance from edge to center (µm); B: Distance from center to edge (µm)                  |      |      |                   |       |                   |       |
| Venericards   | A: Distance from first sample, towards umbo margin (µm); B: /                               |      |      |                   |       |                   |       |
| Turritillines | A: Whorl number from apex to aperture; B: Distance along whorls, from apex to aperture (mm) |      |      |                   |       |                   |       |
| ID            | Species                                                                                     | A    | B    | δ <sup>13</sup> C | stdev | δ <sup>18</sup> O | stdev |
| O206A         | <i>Paraconger sauvagei</i>                                                                  | 50   | 1696 | -3.39             | 0.04  | -2.41             | 0.06  |
| O206A         | <i>Paraconger sauvagei</i>                                                                  | 164  | 1582 | -3.60             | 0.04  | -2.55             | 0.06  |
| O206A         | <i>Paraconger sauvagei</i>                                                                  | 278  | 1468 | -4.18             | 0.04  | -3.05             | 0.06  |
| O206A         | <i>Paraconger sauvagei</i>                                                                  | 392  | 1354 | -4.52             | 0.04  | -3.31             | 0.06  |
| O206A         | <i>Paraconger sauvagei</i>                                                                  | 506  | 1240 | -5.18             | 0.04  | -3.95             | 0.06  |
| O206A         | <i>Paraconger sauvagei</i>                                                                  | 620  | 1126 | -5.55             | 0.04  | -4.50             | 0.06  |
| O206A         | <i>Paraconger sauvagei</i>                                                                  | 734  | 1012 | -5.44             | 0.04  | -4.52             | 0.06  |
| O206A         | <i>Paraconger sauvagei</i>                                                                  | 848  | 898  | -5.12             | 0.04  | -4.48             | 0.06  |
| O206A         | <i>Paraconger sauvagei</i>                                                                  | 962  | 784  | -4.49             | 0.04  | -4.32             | 0.06  |
| O206A         | <i>Paraconger sauvagei</i>                                                                  | 1076 | 670  | -4.03             | 0.04  | -3.98             | 0.06  |
| O206A         | <i>Paraconger sauvagei</i>                                                                  | 1190 | 556  | -3.62             | 0.04  | -3.69             | 0.06  |
| O206A         | <i>Paraconger sauvagei</i>                                                                  | 1304 | 442  | -3.28             | 0.04  | -3.50             | 0.06  |
| O206A         | <i>Paraconger sauvagei</i>                                                                  | 1418 | 328  | -2.98             | 0.04  | -3.48             | 0.06  |
| O206A         | <i>Paraconger sauvagei</i>                                                                  | 1532 | 214  | -2.65             | 0.04  | -3.72             | 0.06  |
| O206A         | <i>Paraconger sauvagei</i>                                                                  | 1646 | 100  | -2.54             | 0.04  | -3.83             | 0.06  |
| O208B         | <i>Neobythites' subregularis</i>                                                            | 50   | 1416 | -0.21             | 0.06  | -2.61             | 0.05  |
| O208B         | <i>Neobythites' subregularis</i>                                                            | 144  | 1322 | -0.33             | 0.06  | -2.65             | 0.05  |
| O208B         | <i>Neobythites' subregularis</i>                                                            | 238  | 1228 | -0.37             | 0.06  | -2.54             | 0.05  |
| O208B         | <i>Neobythites' subregularis</i>                                                            | 332  | 1134 | -0.55             | 0.06  | -2.59             | 0.05  |
| O208B         | <i>Neobythites' subregularis</i>                                                            | 426  | 1040 | -0.47             | 0.06  | -2.39             | 0.05  |
| O208B         | <i>Neobythites' subregularis</i>                                                            | 520  | 946  | -0.76             | 0.06  | -2.29             | 0.05  |
| O208B         | <i>Neobythites' subregularis</i>                                                            | 614  | 852  | -0.80             | 0.06  | -2.36             | 0.05  |
| O208B         | <i>Neobythites' subregularis</i>                                                            | 708  | 758  | -0.77             | 0.06  | -2.31             | 0.05  |
| O208B         | <i>Neobythites' subregularis</i>                                                            | 802  | 664  | -0.75             | 0.06  | -2.06             | 0.05  |
| O208B         | <i>Neobythites' subregularis</i>                                                            | 896  | 570  | -0.75             | 0.06  | -2.13             | 0.05  |
| O208B         | <i>Neobythites' subregularis</i>                                                            | 990  | 476  | -0.79             | 0.06  | -2.21             | 0.05  |
| O208B         | <i>Neobythites' subregularis</i>                                                            | 1084 | 382  | -0.95             | 0.06  | -2.48             | 0.05  |
| O208B         | <i>Neobythites' subregularis</i>                                                            | 1178 | 288  | -0.91             | 0.06  | -2.59             | 0.05  |
| O208B         | <i>Neobythites' subregularis</i>                                                            | 1272 | 194  | -0.99             | 0.06  | -2.77             | 0.05  |
| O208B         | <i>Neobythites' subregularis</i>                                                            | 1366 | 100  | -1.12             | 0.06  | -2.73             | 0.05  |
| O205B         | <i>Paraconger sauvagei</i>                                                                  | 50   | 2847 | -4.24             | 0.01  | -3.28             | 0.03  |
| O205B         | <i>Paraconger sauvagei</i>                                                                  | 134  | 2763 | -3.72             | 0.01  | -3.15             | 0.03  |
| O205B         | <i>Paraconger sauvagei</i>                                                                  | 218  | 2679 | -3.17             | 0.01  | -2.77             | 0.03  |
| O205B         | <i>Paraconger sauvagei</i>                                                                  | 302  | 2595 | -2.63             | 0.01  | -2.34             | 0.03  |
| O205B         | <i>Paraconger sauvagei</i>                                                                  | 386  | 2511 |                   |       |                   |       |
| O205B         | <i>Paraconger sauvagei</i>                                                                  | 470  | 2427 | -3.94             | 0.03  | -2.80             | 0.06  |
| O205B         | <i>Paraconger sauvagei</i>                                                                  | 554  | 2343 | -4.91             | 0.03  | -3.40             | 0.06  |
| O205B         | <i>Paraconger sauvagei</i>                                                                  | 638  | 2259 | -5.15             | 0.03  | -3.68             | 0.06  |
| O205B         | <i>Paraconger sauvagei</i>                                                                  | 722  | 2175 | -4.87             | 0.03  | -3.86             | 0.06  |
| O205B         | <i>Paraconger sauvagei</i>                                                                  | 806  | 2091 | -4.23             | 0.03  | -3.64             | 0.06  |
| O205B         | <i>Paraconger sauvagei</i>                                                                  | 890  | 2007 | -3.38             | 0.03  | -3.18             | 0.06  |
| O205B         | <i>Paraconger sauvagei</i>                                                                  | 974  | 1923 | -2.73             | 0.03  | -2.66             | 0.06  |
| O205B         | <i>Paraconger sauvagei</i>                                                                  | 1058 | 1839 | -2.41             | 0.03  | -2.40             | 0.06  |
| O205B         | <i>Paraconger sauvagei</i>                                                                  | 1142 | 1755 | -2.08             | 0.03  | -2.22             | 0.06  |
| O205B         | <i>Paraconger sauvagei</i>                                                                  | 1226 | 1671 | -2.19             | 0.03  | -2.17             | 0.06  |
| O205B         | <i>Paraconger sauvagei</i>                                                                  | 1310 | 1587 | -2.81             | 0.03  | -2.64             | 0.06  |
| O205B         | <i>Paraconger sauvagei</i>                                                                  | 1394 | 1503 | -3.22             | 0.03  | -2.83             | 0.06  |
| O205B         | <i>Paraconger sauvagei</i>                                                                  | 1478 | 1419 | -3.96             | 0.03  | -3.15             | 0.06  |
| O205B         | <i>Paraconger sauvagei</i>                                                                  | 1562 | 1335 | -4.21             | 0.03  | -3.38             | 0.06  |
| O205B         | <i>Paraconger sauvagei</i>                                                                  | 1646 | 1251 | -4.35             | 0.03  | -3.59             | 0.06  |
| O205B         | <i>Paraconger sauvagei</i>                                                                  | 1730 | 1167 | -4.45             | 0.03  | -3.79             | 0.06  |
| O205B         | <i>Paraconger sauvagei</i>                                                                  | 1814 | 1083 | -4.51             | 0.03  | -4.06             | 0.06  |
| O205B         | <i>Paraconger sauvagei</i>                                                                  | 1898 | 999  | -4.43             | 0.03  | -4.05             | 0.06  |
| O205B         | <i>Paraconger sauvagei</i>                                                                  | 1982 | 915  | -4.46             | 0.03  | -4.24             | 0.06  |
| O205B         | <i>Paraconger sauvagei</i>                                                                  | 2145 | 752  | -4.43             | 0.03  | -4.22             | 0.06  |
| O205B         | <i>Paraconger sauvagei</i>                                                                  | 2308 | 589  | -4.23             | 0.03  | -4.18             | 0.06  |
| O205B         | <i>Paraconger sauvagei</i>                                                                  | 2471 | 426  | -4.14             | 0.03  | -4.25             | 0.06  |
| O205B         | <i>Paraconger sauvagei</i>                                                                  | 2634 | 263  | -3.75             | 0.03  | -3.90             | 0.06  |
| O205B         | <i>Paraconger sauvagei</i>                                                                  | 2797 | 100  | -3.73             | 0.06  | -3.79             | 0.05  |

|       |                                      |      |      |              |      |              |      |
|-------|--------------------------------------|------|------|--------------|------|--------------|------|
| O207B | <i>Neobythites' subregularis</i>     | 50   | 1696 | <b>-1.31</b> | 0.01 | <b>-1.82</b> | 0.03 |
| O207B | <i>Neobythites' subregularis</i>     | 164  | 1582 | <b>-1.42</b> | 0.01 | <b>-2.22</b> | 0.03 |
| O207B | <i>Neobythites' subregularis</i>     | 278  | 1468 | <b>-1.33</b> | 0.01 | <b>-2.37</b> | 0.03 |
| O207B | <i>Neobythites' subregularis</i>     | 392  | 1354 | <b>-1.39</b> | 0.01 | <b>-3.07</b> | 0.03 |
| O207B | <i>Neobythites' subregularis</i>     | 506  | 1240 | <b>-1.20</b> | 0.01 | <b>-3.43</b> | 0.03 |
| O207B | <i>Neobythites' subregularis</i>     | 620  | 1126 | <b>-0.52</b> | 0.01 | <b>-3.13</b> | 0.03 |
| O207B | <i>Neobythites' subregularis</i>     | 734  | 1012 | <b>-0.37</b> | 0.01 | <b>-2.83</b> | 0.03 |
| O207B | <i>Neobythites' subregularis</i>     | 848  | 898  | <b>-0.38</b> | 0.01 | <b>-2.58</b> | 0.03 |
| O207B | <i>Neobythites' subregularis</i>     | 962  | 784  | <b>-0.61</b> | 0.01 | <b>-2.52</b> | 0.03 |
| O207B | <i>Neobythites' subregularis</i>     | 1076 | 670  | <b>-0.81</b> | 0.01 | <b>-2.58</b> | 0.03 |
| O207B | <i>Neobythites' subregularis</i>     | 1190 | 556  | <b>-0.77</b> | 0.01 | <b>-2.48</b> | 0.03 |
| O207B | <i>Neobythites' subregularis</i>     | 1304 | 442  | <b>-0.82</b> | 0.01 | <b>-2.54</b> | 0.03 |
| O207B | <i>Neobythites' subregularis</i>     | 1418 | 328  | <b>-0.88</b> | 0.03 | <b>-2.56</b> | 0.06 |
| O207B | <i>Neobythites' subregularis</i>     | 1532 | 214  | <b>-0.92</b> | 0.01 | <b>-2.68</b> | 0.03 |
| O207B | <i>Neobythites' subregularis</i>     | 1646 | 100  |              |      |              |      |
| B13D  | <i>Venericor planicosta lerichei</i> | 50   |      | <b>0.30</b>  | 0.03 | <b>-4.17</b> | 0.15 |
| B13D  | <i>Venericor planicosta lerichei</i> | 204  |      | <b>0.45</b>  | 0.03 | <b>-4.06</b> | 0.15 |
| B13D  | <i>Venericor planicosta lerichei</i> | 359  |      | <b>0.38</b>  | 0.03 | <b>-3.19</b> | 0.15 |
| B13D  | <i>Venericor planicosta lerichei</i> | 513  |      | <b>0.04</b>  | 0.03 | <b>-2.47</b> | 0.15 |
| B13D  | <i>Venericor planicosta lerichei</i> | 667  |      | <b>-0.13</b> | 0.03 | <b>-2.16</b> | 0.15 |
| B13D  | <i>Venericor planicosta lerichei</i> | 821  |      | <b>-0.09</b> | 0.03 | <b>-1.66</b> | 0.15 |
| B13D  | <i>Venericor planicosta lerichei</i> | 976  |      | <b>0.17</b>  | 0.03 | <b>-2.00</b> | 0.15 |
| B13D  | <i>Venericor planicosta lerichei</i> | 1130 |      | <b>0.62</b>  | 0.03 | <b>-2.21</b> | 0.15 |
| B13D  | <i>Venericor planicosta lerichei</i> | 1284 |      | <b>0.93</b>  | 0.03 | <b>-2.69</b> | 0.15 |
| B13D  | <i>Venericor planicosta lerichei</i> | 1439 |      | <b>0.92</b>  | 0.03 | <b>-2.93</b> | 0.15 |
| B13D  | <i>Venericor planicosta lerichei</i> | 1593 |      | <b>0.54</b>  | 0.03 | <b>-3.31</b> | 0.15 |
| B13D  | <i>Venericor planicosta lerichei</i> | 1747 |      | <b>0.28</b>  | 0.03 | <b>-3.59</b> | 0.15 |
| B13D  | <i>Venericor planicosta lerichei</i> | 1901 |      | <b>-0.11</b> | 0.03 | <b>-4.05</b> | 0.15 |
| B13D  | <i>Venericor planicosta lerichei</i> | 2056 |      | <b>-0.07</b> | 0.03 | <b>-4.57</b> | 0.15 |
| B13D  | <i>Venericor planicosta lerichei</i> | 2210 |      | <b>-0.27</b> | 0.03 | <b>-3.76</b> | 0.15 |
| B13D  | <i>Venericor planicosta lerichei</i> | 2364 |      | <b>-0.64</b> | 0.03 | <b>-2.08</b> | 0.15 |
| B13D  | <i>Venericor planicosta lerichei</i> | 2519 |      | <b>-0.93</b> | 0.03 | <b>-1.48</b> | 0.15 |
| B13D  | <i>Venericor planicosta lerichei</i> | 2673 |      | <b>-1.12</b> | 0.03 | <b>-2.25</b> | 0.15 |
| B13D  | <i>Venericor planicosta lerichei</i> | 2827 |      | <b>-0.56</b> | 0.03 | <b>-3.08</b> | 0.09 |
| B13D  | <i>Venericor planicosta lerichei</i> | 2982 |      | <b>0.50</b>  | 0.03 | <b>-3.30</b> | 0.15 |
| B13D  | <i>Venericor planicosta lerichei</i> | 3136 |      | <b>1.00</b>  | 0.03 | <b>-3.88</b> | 0.15 |
| B13D  | <i>Venericor planicosta lerichei</i> | 3290 |      | <b>0.45</b>  | 0.03 | <b>-4.15</b> | 0.15 |
| B13D  | <i>Venericor planicosta lerichei</i> | 3444 |      | <b>0.71</b>  | 0.03 | <b>-4.13</b> | 0.15 |
| B13D  | <i>Venericor planicosta lerichei</i> | 3599 |      | <b>0.35</b>  | 0.03 | <b>-4.80</b> | 0.15 |
| B13D  | <i>Venericor planicosta lerichei</i> | 3753 |      | <b>-0.16</b> | 0.03 | <b>-4.19</b> | 0.09 |
| B13D  | <i>Venericor planicosta lerichei</i> | 3907 |      | <b>-0.24</b> | 0.03 | <b>-3.14</b> | 0.09 |
| B13D  | <i>Venericor planicosta lerichei</i> | 4062 |      | <b>-0.30</b> | 0.03 | <b>-2.00</b> | 0.09 |
| B13D  | <i>Venericor planicosta lerichei</i> | 4216 |      | <b>-0.06</b> | 0.03 | <b>-1.60</b> | 0.09 |
| B13D  | <i>Venericor planicosta lerichei</i> | 4370 |      |              |      |              |      |
| B13D  | <i>Venericor planicosta lerichei</i> | 4524 |      | <b>0.21</b>  | 0.02 | <b>-2.99</b> | 0.02 |
| B13D  | <i>Venericor planicosta lerichei</i> | 4679 |      | <b>0.35</b>  | 0.02 | <b>-3.35</b> | 0.03 |
| B13D  | <i>Venericor planicosta lerichei</i> | 4833 |      | <b>0.43</b>  | 0.02 | <b>-3.67</b> | 0.03 |
| B13D  | <i>Venericor planicosta lerichei</i> | 4987 |      | <b>0.83</b>  | 0.02 | <b>-3.95</b> | 0.04 |
| B13D  | <i>Venericor planicosta lerichei</i> | 5142 |      | <b>0.54</b>  | 0.02 | <b>-4.63</b> | 0.04 |
| B13D  | <i>Venericor planicosta lerichei</i> | 5296 |      | <b>-0.05</b> | 0.02 | <b>-5.25</b> | 0.02 |
| B13D  | <i>Venericor planicosta lerichei</i> | 5450 |      | <b>0.07</b>  | 0.02 | <b>-4.82</b> | 0.03 |
| B14E  | <i>Venericor planicosta lerichei</i> | 50   |      | <b>0.34</b>  | 0.02 | <b>-5.32</b> | 0.03 |
| B14E  | <i>Venericor planicosta lerichei</i> | 277  |      | <b>0.76</b>  | 0.03 | <b>-4.55</b> | 0.04 |
| B14E  | <i>Venericor planicosta lerichei</i> | 504  |      | <b>0.56</b>  | 0.03 | <b>-4.23</b> | 0.03 |
| B14E  | <i>Venericor planicosta lerichei</i> | 731  |      | <b>0.71</b>  | 0.02 | <b>-3.53</b> | 0.03 |
| B14E  | <i>Venericor planicosta lerichei</i> | 959  |      | <b>0.84</b>  | 0.03 | <b>-2.78</b> | 0.05 |
| B14E  | <i>Venericor planicosta lerichei</i> | 1186 |      | <b>0.75</b>  | 0.03 | <b>-2.13</b> | 0.04 |
| B14E  | <i>Venericor planicosta lerichei</i> | 1413 |      | <b>0.82</b>  | 0.02 | <b>-2.34</b> | 0.03 |
| B14E  | <i>Venericor planicosta lerichei</i> | 1640 |      | <b>1.02</b>  | 0.02 | <b>-2.25</b> | 0.03 |
| B14E  | <i>Venericor planicosta lerichei</i> | 1867 |      | <b>1.02</b>  | 0.01 | <b>-2.47</b> | 0.04 |
| B14E  | <i>Venericor planicosta lerichei</i> | 2094 |      | <b>0.73</b>  | 0.01 | <b>-3.24</b> | 0.03 |
| B14E  | <i>Venericor planicosta lerichei</i> | 2321 |      | <b>0.55</b>  | 0.02 | <b>-4.22</b> | 0.04 |
| B14E  | <i>Venericor planicosta lerichei</i> | 2549 |      | <b>0.89</b>  | 0.03 | <b>-4.83</b> | 0.05 |
| B14E  | <i>Venericor planicosta lerichei</i> | 2776 |      | <b>1.32</b>  | 0.03 | <b>-5.11</b> | 0.09 |
| B14E  | <i>Venericor planicosta lerichei</i> | 3003 |      | <b>0.87</b>  | 0.03 | <b>-5.27</b> | 0.09 |
| B14E  | <i>Venericor planicosta lerichei</i> | 3230 |      | <b>0.66</b>  | 0.03 | <b>-4.87</b> | 0.09 |
| B14E  | <i>Venericor planicosta lerichei</i> | 3457 |      | <b>0.70</b>  | 0.03 | <b>-4.18</b> | 0.09 |
| B14E  | <i>Venericor planicosta lerichei</i> | 3684 |      | <b>1.03</b>  | 0.03 | <b>-3.45</b> | 0.09 |
| B14E  | <i>Venericor planicosta lerichei</i> | 3911 |      | <b>0.85</b>  | 0.03 | <b>-2.70</b> | 0.09 |

|      |                                      |      |       |              |      |              |      |
|------|--------------------------------------|------|-------|--------------|------|--------------|------|
| B14E | <i>Venericor planicosta lerichei</i> | 4139 |       | <b>1.19</b>  | 0.03 | <b>-1.65</b> | 0.09 |
| B14E | <i>Venericor planicosta lerichei</i> | 4366 |       | <b>1.34</b>  | 0.03 | <b>-2.72</b> | 0.09 |
| B14E | <i>Venericor planicosta lerichei</i> | 4593 |       | <b>1.64</b>  | 0.03 | <b>-3.31</b> | 0.09 |
| B14E | <i>Venericor planicosta lerichei</i> | 4820 |       | <b>1.52</b>  | 0.03 | <b>-4.23</b> | 0.09 |
| B14E | <i>Venericor planicosta lerichei</i> | 5047 |       | <b>0.94</b>  | 0.03 | <b>-4.63</b> | 0.09 |
| B14E | <i>Venericor planicosta lerichei</i> | 5274 |       | <b>0.79</b>  | 0.02 | <b>-5.09</b> | 0.05 |
| B14E | <i>Venericor planicosta lerichei</i> | 5501 |       | <b>0.28</b>  | 0.03 | <b>-4.66</b> | 0.09 |
| B14E | <i>Venericor planicosta lerichei</i> | 5729 |       | <b>0.34</b>  | 0.03 | <b>-3.94</b> | 0.09 |
| B14E | <i>Venericor planicosta lerichei</i> | 5956 |       | <b>0.46</b>  | 0.03 | <b>-2.56</b> | 0.09 |
| B14E | <i>Venericor planicosta lerichei</i> | 6183 |       | <b>0.73</b>  | 0.03 | <b>-2.64</b> | 0.09 |
| B14E | <i>Venericor planicosta lerichei</i> | 6410 |       | <b>0.92</b>  | 0.02 | <b>-3.16</b> | 0.05 |
| B14E | <i>Venericor planicosta lerichei</i> | 6637 |       | <b>0.90</b>  | 0.03 | <b>-3.50</b> | 0.09 |
| B14E | <i>Venericor planicosta lerichei</i> | 6864 |       | <b>0.65</b>  | 0.03 | <b>-4.32</b> | 0.09 |
| B14E | <i>Venericor planicosta lerichei</i> | 7091 |       | <b>0.60</b>  | 0.03 | <b>-4.95</b> | 0.09 |
| B14E | <i>Venericor planicosta lerichei</i> | 7318 |       | <b>0.80</b>  | 0.03 | <b>-5.23</b> | 0.09 |
| B14E | <i>Venericor planicosta lerichei</i> | 7546 |       | <b>-0.15</b> | 0.03 | <b>-5.30</b> | 0.09 |
| B14E | <i>Venericor planicosta lerichei</i> | 7773 |       | <b>0.08</b>  | 0.03 | <b>-4.78</b> | 0.09 |
| B14E | <i>Venericor planicosta lerichei</i> | 8000 |       | <b>-0.07</b> | 0.03 | <b>-3.85</b> | 0.09 |
| B11H | <i>Haustator solanderi</i>           | 2    | 8.1   | <b>1.41</b>  | 0.02 | <b>-4.73</b> | 0.03 |
| B11H | <i>Haustator solanderi</i>           | 3    | 10.3  | <b>1.59</b>  | 0.02 | <b>-4.55</b> | 0.03 |
| B11H | <i>Haustator solanderi</i>           | 3    | 11.5  | <b>1.68</b>  | 0.02 | <b>-4.52</b> | 0.03 |
| B11H | <i>Haustator solanderi</i>           | 3    | 12.7  | <b>1.59</b>  | 0.02 | <b>-4.66</b> | 0.03 |
| B11H | <i>Haustator solanderi</i>           | 4    | 14.0  | <b>1.93</b>  | 0.02 | <b>-4.36</b> | 0.03 |
| B11H | <i>Haustator solanderi</i>           | 4    | 15.4  | <b>2.08</b>  | 0.02 | <b>-4.19</b> | 0.03 |
| B11H | <i>Haustator solanderi</i>           | 4    | 16.9  | <b>1.98</b>  | 0.02 | <b>-4.10</b> | 0.03 |
| B11H | <i>Haustator solanderi</i>           | 4    | 18.4  | <b>2.12</b>  | 0.02 | <b>-4.05</b> | 0.03 |
| B11H | <i>Haustator solanderi</i>           | 5    | 20.0  | <b>2.24</b>  | 0.02 | <b>-4.16</b> | 0.03 |
| B11H | <i>Haustator solanderi</i>           | 5    | 21.7  | <b>2.21</b>  | 0.02 | <b>-4.15</b> | 0.03 |
| B11H | <i>Haustator solanderi</i>           | 5    | 23.5  | <b>2.44</b>  | 0.02 | <b>-4.04</b> | 0.03 |
| B11H | <i>Haustator solanderi</i>           | 5    | 25.4  | <b>2.32</b>  | 0.02 | <b>-4.28</b> | 0.03 |
| B11H | <i>Haustator solanderi</i>           | 6    | 27.3  | <b>2.38</b>  | 0.01 | <b>-4.51</b> | 0.03 |
| B11H | <i>Haustator solanderi</i>           | 6    | 29.3  | <b>1.72</b>  | 0.02 | <b>-4.14</b> | 0.03 |
| B11H | <i>Haustator solanderi</i>           | 6    | 31.4  | <b>1.98</b>  | 0.01 | <b>-4.31</b> | 0.03 |
| B11H | <i>Haustator solanderi</i>           | 6    | 33.6  | <b>2.77</b>  | 0.01 | <b>-4.58</b> | 0.03 |
| B11H | <i>Haustator solanderi</i>           | 7    | 35.9  | <b>2.97</b>  | 0.02 | <b>-4.76</b> | 0.03 |
| B11H | <i>Haustator solanderi</i>           | 7    | 38.3  | <b>2.28</b>  | 0.01 | <b>-4.27</b> | 0.03 |
| B11H | <i>Haustator solanderi</i>           | 7    | 40.8  | <b>2.53</b>  | 0.02 | <b>-4.10</b> | 0.03 |
| B11H | <i>Haustator solanderi</i>           | 7    | 43.4  | <b>2.58</b>  | 0.01 | <b>-3.96</b> | 0.03 |
| B11H | <i>Haustator solanderi</i>           | 8    | 46.1  | <b>3.06</b>  | 0.01 | <b>-3.75</b> | 0.03 |
| B11H | <i>Haustator solanderi</i>           | 8    | 48.9  | <b>2.98</b>  | 0.01 | <b>-3.52</b> | 0.03 |
| B11H | <i>Haustator solanderi</i>           | 8    | 51.8  | <b>3.68</b>  | 0.02 | <b>-3.36</b> | 0.03 |
| B11H | <i>Haustator solanderi</i>           | 8    | 54.8  | <b>2.64</b>  | 0.02 | <b>-4.12</b> | 0.03 |
| B11H | <i>Haustator solanderi</i>           | 9    | 57.9  | <b>3.27</b>  | 0.01 | <b>-4.14</b> | 0.03 |
| B11H | <i>Haustator solanderi</i>           | 9    | 61.1  | <b>2.71</b>  | 0.01 | <b>-4.49</b> | 0.03 |
| B11H | <i>Haustator solanderi</i>           | 9    | 64.4  | <b>2.61</b>  | 0.01 | <b>-4.54</b> | 0.03 |
| B11H | <i>Haustator solanderi</i>           | 9    | 67.8  | <b>2.84</b>  | 0.01 | <b>-4.56</b> | 0.03 |
| B11H | <i>Haustator solanderi</i>           | 10   | 71.4  | <b>2.85</b>  | 0.01 | <b>-4.59</b> | 0.03 |
| B11H | <i>Haustator solanderi</i>           | 10   | 75.1  | <b>2.90</b>  | 0.01 | <b>-4.56</b> | 0.03 |
| B11H | <i>Haustator solanderi</i>           | 10   | 78.8  | <b>2.93</b>  | 0.01 | <b>-4.27</b> | 0.03 |
| B11H | <i>Haustator solanderi</i>           | 10   | 82.8  | <b>2.96</b>  | 0.01 | <b>-4.21</b> | 0.03 |
| B11H | <i>Haustator solanderi</i>           | 11   | 86.8  | <b>2.46</b>  | 0.02 | <b>-4.25</b> | 0.03 |
| B11H | <i>Haustator solanderi</i>           | 11   | 91.0  | <b>3.11</b>  | 0.01 | <b>-4.09</b> | 0.03 |
| B11H | <i>Haustator solanderi</i>           | 11   | 95.3  | <b>3.18</b>  | 0.01 | <b>-4.03</b> | 0.03 |
| B11H | <i>Haustator solanderi</i>           | 11   | 99.7  | <b>3.24</b>  | 0.02 | <b>-3.98</b> | 0.03 |
| B11H | <i>Haustator solanderi</i>           | 12   | 104.2 | <b>3.20</b>  | 0.02 | <b>-4.31</b> | 0.04 |
| B11H | <i>Haustator solanderi</i>           | 12   | 108.9 | <b>3.39</b>  | 0.02 | <b>-4.36</b> | 0.04 |
| B11H | <i>Haustator solanderi</i>           | 12   | 113.7 | <b>3.28</b>  | 0.02 | <b>-4.69</b> | 0.04 |
| B11H | <i>Haustator solanderi</i>           | 12   | 118.7 | <b>3.39</b>  | 0.02 | <b>-4.73</b> | 0.04 |
| B11H | <i>Haustator solanderi</i>           | 13   | 123.8 | <b>2.80</b>  | 0.02 | <b>-4.68</b> | 0.04 |
| B11H | <i>Haustator solanderi</i>           | 13   | 128.8 | <b>3.18</b>  | 0.02 | <b>-4.68</b> | 0.04 |
| B11H | <i>Haustator solanderi</i>           | 13   | 133.8 | <b>3.45</b>  | 0.02 | <b>-4.71</b> | 0.04 |
| B11H | <i>Haustator solanderi</i>           | 13   | 138.8 | <b>3.47</b>  | 0.02 | <b>-4.71</b> | 0.04 |
| B11H | <i>Haustator solanderi</i>           | 14   | 143.9 | <b>3.33</b>  | 0.02 | <b>-4.70</b> | 0.04 |
| B11H | <i>Haustator solanderi</i>           | 14   | 148.9 | <b>3.40</b>  | 0.02 | <b>-4.77</b> | 0.04 |
| B11H | <i>Haustator solanderi</i>           | 14   | 153.9 | <b>2.21</b>  | 0.02 | <b>-5.07</b> | 0.04 |
| B11H | <i>Haustator solanderi</i>           | 14   | 159.0 | <b>2.73</b>  | 0.02 | <b>-4.96</b> | 0.04 |
| B11F | <i>Haustator solanderi</i>           | 1    | 2.3   | <b>2.58</b>  | 0.02 | <b>-3.49</b> | 0.04 |
| B11F | <i>Haustator solanderi</i>           | 1    | 3.0   | <b>2.48</b>  | 0.02 | <b>-3.73</b> | 0.04 |
| B11F | <i>Haustator solanderi</i>           | 1    | 3.7   | <b>2.23</b>  | 0.02 | <b>-4.08</b> | 0.04 |

|      |                            |    |       |             |      |              |      |
|------|----------------------------|----|-------|-------------|------|--------------|------|
| B11F | <i>Haustator solanderi</i> | 1  | 4.4   | <b>2.16</b> | 0.02 | <b>-4.22</b> | 0.04 |
| B11F | <i>Haustator solanderi</i> | 2  | 5.3   | <b>2.06</b> | 0.02 | <b>-4.09</b> | 0.04 |
| B11F | <i>Haustator solanderi</i> | 2  | 6.2   | <b>2.14</b> | 0.01 | <b>-4.17</b> | 0.03 |
| B11F | <i>Haustator solanderi</i> | 2  | 7.1   | <b>2.21</b> | 0.02 | <b>-3.84</b> | 0.04 |
| B11F | <i>Haustator solanderi</i> | 2  | 8.1   | <b>2.39</b> | 0.02 | <b>-4.01</b> | 0.04 |
| B11F | <i>Haustator solanderi</i> | 3  | 9.1   | <b>2.49</b> | 0.02 | <b>-3.95</b> | 0.04 |
| B11F | <i>Haustator solanderi</i> | 3  | 10.3  | <b>2.69</b> | 0.02 | <b>-3.85</b> | 0.04 |
| B11F | <i>Haustator solanderi</i> | 3  | 11.5  | <b>2.62</b> | 0.02 | <b>-3.96</b> | 0.04 |
| B11F | <i>Haustator solanderi</i> | 3  | 12.7  | <b>2.68</b> | 0.02 | <b>-4.01</b> | 0.04 |
| B11F | <i>Haustator solanderi</i> | 4  | 14.0  | <b>3.02</b> | 0.01 | <b>-3.66</b> | 0.03 |
| B11F | <i>Haustator solanderi</i> | 4  | 15.4  | <b>2.73</b> | 0.01 | <b>-4.19</b> | 0.03 |
| B11F | <i>Haustator solanderi</i> | 4  | 16.9  | <b>2.70</b> | 0.01 | <b>-4.09</b> | 0.03 |
| B11F | <i>Haustator solanderi</i> | 4  | 18.4  | <b>2.48</b> | 0.01 | <b>-4.21</b> | 0.03 |
| B11F | <i>Haustator solanderi</i> | 5  | 20.0  | <b>2.39</b> | 0.01 | <b>-4.15</b> | 0.03 |
| B11F | <i>Haustator solanderi</i> | 5  | 21.7  | <b>2.51</b> | 0.01 | <b>-4.27</b> | 0.03 |
| B11F | <i>Haustator solanderi</i> | 5  | 23.5  | <b>2.56</b> | 0.01 | <b>-4.36</b> | 0.03 |
| B11F | <i>Haustator solanderi</i> | 5  | 25.4  | <b>2.37</b> | 0.01 | <b>-4.51</b> | 0.03 |
| B11F | <i>Haustator solanderi</i> | 6  | 27.3  | <b>2.91</b> | 0.01 | <b>-4.41</b> | 0.03 |
| B11F | <i>Haustator solanderi</i> | 6  | 29.3  | <b>2.56</b> | 0.01 | <b>-4.55</b> | 0.03 |
| B11F | <i>Haustator solanderi</i> | 6  | 31.4  | <b>2.81</b> | 0.01 | <b>-4.51</b> | 0.03 |
| B11F | <i>Haustator solanderi</i> | 6  | 33.6  | <b>2.66</b> | 0.01 | <b>-4.51</b> | 0.03 |
| B11F | <i>Haustator solanderi</i> | 7  | 35.9  | <b>2.99</b> | 0.01 | <b>-4.20</b> | 0.03 |
| B11F | <i>Haustator solanderi</i> | 7  | 38.3  | <b>3.10</b> | 0.01 | <b>-4.29</b> | 0.03 |
| B11F | <i>Haustator solanderi</i> | 7  | 40.8  | <b>3.14</b> | 0.01 | <b>-4.37</b> | 0.03 |
| B11F | <i>Haustator solanderi</i> | 7  | 43.4  | <b>3.21</b> | 0.01 | <b>-4.65</b> | 0.03 |
| B11F | <i>Haustator solanderi</i> | 8  | 46.1  | <b>3.11</b> | 0.01 | <b>-4.67</b> | 0.03 |
| B11F | <i>Haustator solanderi</i> | 8  | 48.9  | <b>2.85</b> | 0.01 | <b>-4.54</b> | 0.03 |
| B11F | <i>Haustator solanderi</i> | 8  | 51.8  | <b>2.65</b> | 0.01 | <b>-4.47</b> | 0.03 |
| B11F | <i>Haustator solanderi</i> | 8  | 54.8  | <b>2.96</b> | 0.01 | <b>-4.53</b> | 0.03 |
| B11F | <i>Haustator solanderi</i> | 9  | 57.9  | <b>3.01</b> | 0.01 | <b>-4.26</b> | 0.03 |
| B11F | <i>Haustator solanderi</i> | 9  | 61.1  | <b>3.64</b> | 0.01 | <b>-4.24</b> | 0.03 |
| B11F | <i>Haustator solanderi</i> | 9  | 64.4  | <b>3.68</b> | 0.01 | <b>-4.14</b> | 0.03 |
| B11F | <i>Haustator solanderi</i> | 9  | 67.8  | <b>3.71</b> | 0.01 | <b>-3.97</b> | 0.03 |
| B11F | <i>Haustator solanderi</i> | 10 | 71.4  | <b>3.62</b> | 0.01 | <b>-4.38</b> | 0.03 |
| B11F | <i>Haustator solanderi</i> | 10 | 75.1  | <b>3.62</b> | 0.01 | <b>-4.49</b> | 0.03 |
| B11F | <i>Haustator solanderi</i> | 10 | 78.8  | <b>3.84</b> | 0.01 | <b>-3.97</b> | 0.03 |
| B11F | <i>Haustator solanderi</i> | 10 | 82.8  | <b>3.53</b> | 0.02 | <b>-4.40</b> | 0.02 |
| B11F | <i>Haustator solanderi</i> | 11 | 86.8  | <b>3.74</b> | 0.02 | <b>-4.14</b> | 0.02 |
| B11F | <i>Haustator solanderi</i> | 11 | 91.0  | <b>3.70</b> | 0.02 | <b>-3.82</b> | 0.02 |
| B11F | <i>Haustator solanderi</i> | 11 | 95.3  | <b>3.88</b> | 0.02 | <b>-3.69</b> | 0.02 |
| B11F | <i>Haustator solanderi</i> | 11 | 99.7  | <b>3.90</b> | 0.01 | <b>-3.33</b> | 0.03 |
| B11F | <i>Haustator solanderi</i> | 12 | 104.2 | <b>3.69</b> | 0.02 | <b>-3.33</b> | 0.02 |
| B11F | <i>Haustator solanderi</i> | 12 | 108.9 | <b>3.57</b> | 0.01 | <b>-3.71</b> | 0.03 |
| B11F | <i>Haustator solanderi</i> | 12 | 113.7 | <b>3.24</b> | 0.02 | <b>-4.34</b> | 0.02 |
| B11F | <i>Haustator solanderi</i> | 12 | 118.7 | <b>2.11</b> | 0.02 | <b>-4.76</b> | 0.02 |
| B11F | <i>Haustator solanderi</i> | 13 | 123.8 | <b>2.45</b> | 0.02 | <b>-4.64</b> | 0.02 |
| B11F | <i>Haustator solanderi</i> | 13 | 128.8 | <b>2.00</b> | 0.02 | <b>-3.99</b> | 0.02 |
| B11F | <i>Haustator solanderi</i> | 13 | 133.8 | <b>2.21</b> | 0.01 | <b>-3.54</b> | 0.03 |
| B11E | <i>Haustator solanderi</i> | 2  | 7.1   | <b>1.75</b> | 0.02 | <b>-3.59</b> | 0.02 |
| B11E | <i>Haustator solanderi</i> | 3  | 9.1   | <b>1.83</b> | 0.02 | <b>-3.87</b> | 0.02 |
| B11E | <i>Haustator solanderi</i> | 3  | 11.5  | <b>2.08</b> | 0.02 | <b>-4.38</b> | 0.02 |
| B11E | <i>Haustator solanderi</i> | 4  | 14.0  | <b>2.10</b> | 0.02 | <b>-4.38</b> | 0.02 |
| B11E | <i>Haustator solanderi</i> | 4  | 16.9  | <b>2.00</b> | 0.02 | <b>-3.34</b> | 0.02 |
| B11E | <i>Haustator solanderi</i> | 5  | 20.0  | <b>2.06</b> | 0.02 | <b>-3.34</b> | 0.02 |
| B11E | <i>Haustator solanderi</i> | 5  | 23.5  | <b>2.22</b> | 0.01 | <b>-3.54</b> | 0.03 |
| B11E | <i>Haustator solanderi</i> | 6  | 27.3  | <b>2.37</b> | 0.02 | <b>-3.34</b> | 0.02 |
| B11E | <i>Haustator solanderi</i> | 6  | 31.4  | <b>2.78</b> | 0.01 | <b>-3.30</b> | 0.03 |
| B11E | <i>Haustator solanderi</i> | 7  | 35.9  | <b>2.60</b> | 0.02 | <b>-3.76</b> | 0.02 |
| B11E | <i>Haustator solanderi</i> | 7  | 40.8  | <b>2.57</b> | 0.02 | <b>-3.90</b> | 0.02 |
| B11E | <i>Haustator solanderi</i> | 8  | 46.1  | <b>2.38</b> | 0.02 | <b>-3.70</b> | 0.02 |
| B11E | <i>Haustator solanderi</i> | 8  | 51.8  | <b>2.39</b> | 0.02 | <b>-3.99</b> | 0.02 |
| B11E | <i>Haustator solanderi</i> | 9  | 57.9  | <b>2.45</b> | 0.02 | <b>-4.19</b> | 0.02 |
| B11E | <i>Haustator solanderi</i> | 9  | 64.4  | <b>2.55</b> | 0.02 | <b>-4.25</b> | 0.02 |
| B11E | <i>Haustator solanderi</i> | 10 | 71.4  | <b>2.77</b> | 0.02 | <b>-4.12</b> | 0.02 |
| B11E | <i>Haustator solanderi</i> | 10 | 78.8  | <b>2.63</b> | 0.02 | <b>-4.16</b> | 0.02 |
| B11E | <i>Haustator solanderi</i> | 11 | 86.8  | <b>2.65</b> | 0.02 | <b>-3.69</b> | 0.02 |
| B11E | <i>Haustator solanderi</i> | 11 | 95.3  | <b>3.00</b> | 0.01 | <b>-3.60</b> | 0.03 |
| B11E | <i>Haustator solanderi</i> | 12 | 104.2 | <b>2.89</b> | 0.01 | <b>-3.21</b> | 0.03 |
| B11E | <i>Haustator solanderi</i> | 12 | 113.7 | <b>2.62</b> | 0.01 | <b>-2.62</b> | 0.03 |

|      |                            |    |       |             |      |              |      |
|------|----------------------------|----|-------|-------------|------|--------------|------|
| B11C | <i>Haustator solanderi</i> | 1  | 3.7   | <b>2.80</b> | 0.01 | <b>-3.47</b> | 0.03 |
| B11C | <i>Haustator solanderi</i> | 2  | 5.3   | <b>2.62</b> | 0.01 | <b>-4.23</b> | 0.03 |
| B11C | <i>Haustator solanderi</i> | 2  | 7.1   | <b>2.64</b> | 0.01 | <b>-4.28</b> | 0.03 |
| B11C | <i>Haustator solanderi</i> | 3  | 9.1   | <b>2.76</b> | 0.01 | <b>-4.01</b> | 0.03 |
| B11C | <i>Haustator solanderi</i> | 3  | 11.5  | <b>2.81</b> | 0.01 | <b>-4.36</b> | 0.03 |
| B11C | <i>Haustator solanderi</i> | 4  | 14.0  | <b>2.57</b> | 0.01 | <b>-4.14</b> | 0.03 |
| B11C | <i>Haustator solanderi</i> | 4  | 16.9  | <b>2.06</b> | 0.01 | <b>-3.78</b> | 0.03 |
| B11C | <i>Haustator solanderi</i> | 5  | 20.0  |             |      |              |      |
| B11C | <i>Haustator solanderi</i> | 5  | 23.5  | <b>2.62</b> | 0.01 | <b>-3.21</b> | 0.03 |
| B11C | <i>Haustator solanderi</i> | 6  | 27.3  | <b>3.05</b> | 0.01 | <b>-2.48</b> | 0.03 |
| B11C | <i>Haustator solanderi</i> | 6  | 31.4  | <b>3.27</b> | 0.01 | <b>-2.48</b> | 0.03 |
| B11C | <i>Haustator solanderi</i> | 7  | 35.9  | <b>3.50</b> | 0.01 | <b>-2.45</b> | 0.03 |
| B11C | <i>Haustator solanderi</i> | 7  | 40.8  | <b>3.22</b> | 0.01 | <b>-4.18</b> | 0.03 |
| B11C | <i>Haustator solanderi</i> | 8  | 46.1  | <b>2.86</b> | 0.01 | <b>-4.05</b> | 0.03 |
| B11C | <i>Haustator solanderi</i> | 8  | 51.8  | <b>3.22</b> | 0.01 | <b>-3.76</b> | 0.03 |
| B11C | <i>Haustator solanderi</i> | 9  | 57.9  | <b>3.04</b> | 0.01 | <b>-4.31</b> | 0.03 |
| B11C | <i>Haustator solanderi</i> | 9  | 64.4  | <b>3.00</b> | 0.01 | <b>-4.25</b> | 0.03 |
| B11C | <i>Haustator solanderi</i> | 10 | 71.4  | <b>3.21</b> | 0.01 | <b>-4.48</b> | 0.03 |
| B11C | <i>Haustator solanderi</i> | 10 | 78.8  | <b>3.38</b> | 0.01 | <b>-4.61</b> | 0.03 |
| B11C | <i>Haustator solanderi</i> | 11 | 86.8  | <b>3.20</b> | 0.01 | <b>-3.92</b> | 0.03 |
| B11C | <i>Haustator solanderi</i> | 11 | 95.3  | <b>3.46</b> | 0.01 | <b>-3.63</b> | 0.03 |
| B11C | <i>Haustator solanderi</i> | 12 | 104.2 | <b>2.97</b> | 0.01 | <b>-3.91</b> | 0.03 |
| B11C | <i>Haustator solanderi</i> | 12 | 113.7 | <b>3.31</b> | 0.01 | <b>-4.34</b> | 0.03 |
| B11C | <i>Haustator solanderi</i> | 13 | 123.8 | <b>3.12</b> | 0.01 | <b>-4.14</b> | 0.03 |
|      |                            |    |       |             |      |              |      |
| B11G | <i>Haustator solanderi</i> | 1  | 2.3   | <b>2.48</b> | 0.01 | <b>-4.19</b> | 0.02 |
| B11G | <i>Haustator solanderi</i> | 1  | 3.7   | <b>2.32</b> | 0.01 | <b>-4.37</b> | 0.02 |
| B11G | <i>Haustator solanderi</i> | 2  | 5.3   | <b>2.48</b> | 0.01 | <b>-4.46</b> | 0.02 |
| B11G | <i>Haustator solanderi</i> | 2  | 7.1   | <b>2.45</b> | 0.01 | <b>-4.43</b> | 0.02 |
| B11G | <i>Haustator solanderi</i> | 3  | 9.1   | <b>2.80</b> | 0.01 | <b>-4.35</b> | 0.02 |
| B11G | <i>Haustator solanderi</i> | 3  | 11.5  | <b>2.82</b> | 0.01 | <b>-3.86</b> | 0.02 |
| B11G | <i>Haustator solanderi</i> | 4  | 14.0  | <b>2.99</b> | 0.01 | <b>-3.76</b> | 0.02 |
| B11G | <i>Haustator solanderi</i> | 4  | 16.9  | <b>3.01</b> | 0.01 | <b>-3.87</b> | 0.02 |
| B11G | <i>Haustator solanderi</i> | 5  | 20.0  | <b>2.80</b> | 0.01 | <b>-4.68</b> | 0.02 |
| B11G | <i>Haustator solanderi</i> | 5  | 23.5  | <b>2.89</b> | 0.01 | <b>-4.61</b> | 0.02 |
| B11G | <i>Haustator solanderi</i> | 6  | 27.3  | <b>2.73</b> | 0.01 | <b>-4.57</b> | 0.02 |
| B11G | <i>Haustator solanderi</i> | 6  | 31.4  | <b>2.93</b> | 0.01 | <b>-4.11</b> | 0.02 |
| B11G | <i>Haustator solanderi</i> | 7  | 35.9  | <b>3.01</b> | 0.01 | <b>-3.87</b> | 0.02 |
| B11G | <i>Haustator solanderi</i> | 7  | 40.8  | <b>3.20</b> | 0.01 | <b>-3.44</b> | 0.02 |
| B11G | <i>Haustator solanderi</i> | 8  | 46.1  | <b>3.62</b> | 0.01 | <b>-3.38</b> | 0.02 |
| B11G | <i>Haustator solanderi</i> | 8  | 51.8  | <b>3.29</b> | 0.01 | <b>-4.67</b> | 0.02 |
| B11G | <i>Haustator solanderi</i> | 9  | 57.9  | <b>3.21</b> | 0.01 | <b>-4.69</b> | 0.02 |
| B11G | <i>Haustator solanderi</i> | 9  | 64.4  | <b>3.13</b> | 0.01 | <b>-4.28</b> | 0.02 |
| B11G | <i>Haustator solanderi</i> | 10 | 71.4  | <b>3.36</b> | 0.01 | <b>-4.29</b> | 0.02 |
| B11G | <i>Haustator solanderi</i> | 10 | 78.8  | <b>3.09</b> | 0.01 | <b>-4.38</b> | 0.02 |
| B11G | <i>Haustator solanderi</i> | 11 | 86.8  | <b>3.04</b> | 0.01 | <b>-4.20</b> | 0.02 |
| B11G | <i>Haustator solanderi</i> | 11 | 91.0  | <b>3.48</b> | 0.01 | <b>-4.31</b> | 0.02 |
| B11G | <i>Haustator solanderi</i> | 11 | 95.3  |             |      |              |      |
| B11G | <i>Haustator solanderi</i> | 11 | 99.7  | <b>2.88</b> | 0.01 | <b>-4.36</b> | 0.02 |
|      |                            |    |       |             |      |              |      |
| B11A | <i>Haustator solanderi</i> | 6  | 27.3  | <b>3.00</b> | 0.01 | <b>-3.71</b> | 0.03 |
| B11A | <i>Haustator solanderi</i> | 6  | 30.0  | <b>2.83</b> | 0.01 | <b>-3.51</b> | 0.03 |
| B11A | <i>Haustator solanderi</i> | 6  | 32.9  | <b>2.75</b> | 0.01 | <b>-3.28</b> | 0.03 |
| B11A | <i>Haustator solanderi</i> | 7  | 35.9  | <b>2.75</b> | 0.01 | <b>-3.39</b> | 0.03 |
| B11A | <i>Haustator solanderi</i> | 7  | 39.1  | <b>2.28</b> | 0.01 | <b>-4.30</b> | 0.02 |
| B11A | <i>Haustator solanderi</i> | 7  | 42.5  | <b>2.56</b> | 0.01 | <b>-3.86</b> | 0.03 |
| B11A | <i>Haustator solanderi</i> | 8  | 46.1  | <b>2.92</b> | 0.01 | <b>-3.56</b> | 0.03 |
| B11A | <i>Haustator solanderi</i> | 8  | 49.8  | <b>2.94</b> | 0.01 | <b>-4.09</b> | 0.03 |
| B11A | <i>Haustator solanderi</i> | 8  | 53.7  | <b>3.06</b> | 0.01 | <b>-3.98</b> | 0.02 |
| B11A | <i>Haustator solanderi</i> | 9  | 57.9  | <b>3.21</b> | 0.01 | <b>-4.05</b> | 0.03 |
| B11A | <i>Haustator solanderi</i> | 9  | 62.2  | <b>3.03</b> | 0.01 | <b>-4.43</b> | 0.02 |
| B11A | <i>Haustator solanderi</i> | 9  | 66.7  | <b>2.86</b> | 0.01 | <b>-4.41</b> | 0.03 |
| B11A | <i>Haustator solanderi</i> | 10 | 71.4  | <b>3.06</b> | 0.01 | <b>-4.80</b> | 0.02 |
| B11A | <i>Haustator solanderi</i> | 10 | 75.1  | <b>3.04</b> | 0.01 | <b>-4.64</b> | 0.03 |
| B11A | <i>Haustator solanderi</i> | 10 | 78.8  | <b>2.99</b> | 0.01 | <b>-4.32</b> | 0.03 |
| B11A | <i>Haustator solanderi</i> | 10 | 82.8  | <b>3.23</b> | 0.01 | <b>-4.04</b> | 0.03 |
| B11A | <i>Haustator solanderi</i> | 11 | 86.8  | <b>3.44</b> | 0.01 | <b>-4.34</b> | 0.02 |
| B11A | <i>Haustator solanderi</i> | 11 | 91.0  | <b>3.11</b> | 0.01 | <b>-4.53</b> | 0.03 |
| B11A | <i>Haustator solanderi</i> | 11 | 95.3  | <b>3.43</b> | 0.01 | <b>-4.37</b> | 0.03 |
| B11A | <i>Haustator solanderi</i> | 11 | 99.7  | <b>3.32</b> | 0.01 | <b>-4.40</b> | 0.03 |
| B11A | <i>Haustator solanderi</i> | 12 | 104.2 | <b>3.49</b> | 0.01 | <b>-4.23</b> | 0.03 |

|      |                                                     |    |       |             |      |              |      |
|------|-----------------------------------------------------|----|-------|-------------|------|--------------|------|
| B11A | <i>Haustator solanderi</i>                          | 12 | 108.9 | <b>3.26</b> | 0.01 | <b>-4.49</b> | 0.03 |
| B11A | <i>Haustator solanderi</i>                          | 12 | 113.7 | <b>3.10</b> | 0.01 | <b>-4.60</b> | 0.03 |
| B11A | <i>Haustator solanderi</i>                          | 12 | 118.7 | <b>3.29</b> | 0.01 | <b>-4.44</b> | 0.03 |
| B9A  | <i>Cyclocardia (Arcturellina) sulcata aizyensis</i> |    |       | <b>1.18</b> | 0.02 | <b>-4.85</b> | 0.02 |
| B9B  | <i>Cyclocardia (Arcturellina) sulcata aizyensis</i> |    |       | <b>1.37</b> | 0.02 | <b>-5.03</b> | 0.02 |
| B9C  | <i>Cyclocardia (Arcturellina) sulcata aizyensis</i> |    |       | <b>1.72</b> | 0.02 | <b>-4.47</b> | 0.02 |
| B9D  | <i>Cyclocardia (Arcturellina) sulcata aizyensis</i> |    |       | <b>2.11</b> | 0.02 | <b>-2.35</b> | 0.02 |
| B9D  | <i>Cyclocardia (Arcturellina) sulcata aizyensis</i> |    |       | <b>1.84</b> | 0.01 | <b>-2.54</b> | 0.02 |
| B9E  | <i>Cyclocardia (Arcturellina) sulcata aizyensis</i> |    |       | <b>2.47</b> | 0.02 | <b>-2.57</b> | 0.02 |
| B9E  | <i>Cyclocardia (Arcturellina) sulcata aizyensis</i> |    |       | <b>2.04</b> | 0.01 | <b>-2.73</b> | 0.02 |
| B9E  | <i>Cyclocardia (Arcturellina) sulcata aizyensis</i> |    |       | <b>2.05</b> | 0.04 | <b>-2.60</b> | 0.06 |
| B9F  | <i>Cyclocardia (Arcturellina) sulcata aizyensis</i> |    |       | <b>1.75</b> | 0.01 | <b>-3.97</b> | 0.02 |
| B9F  | <i>Cyclocardia (Arcturellina) sulcata aizyensis</i> |    |       | <b>1.83</b> | 0.01 | <b>-3.65</b> | 0.02 |
| B9G  | <i>Cyclocardia (Arcturellina) sulcata aizyensis</i> |    |       | <b>1.51</b> | 0.02 | <b>-5.05</b> | 0.02 |
| B9G  | <i>Cyclocardia (Arcturellina) sulcata aizyensis</i> |    |       | <b>1.48</b> | 0.04 | <b>-4.83</b> | 0.06 |
| B9H  | <i>Cyclocardia (Arcturellina) sulcata aizyensis</i> |    |       | <b>2.10</b> | 0.02 | <b>-2.38</b> | 0.02 |
| B9H  | <i>Cyclocardia (Arcturellina) sulcata aizyensis</i> |    |       | <b>2.05</b> | 0.01 | <b>-2.57</b> | 0.02 |
| B9H  | <i>Cyclocardia (Arcturellina) sulcata aizyensis</i> |    |       | <b>2.00</b> | 0.04 | <b>-2.34</b> | 0.06 |
| B9I  | <i>Cyclocardia (Arcturellina) sulcata aizyensis</i> |    |       | <b>2.17</b> | 0.02 | <b>-2.80</b> | 0.02 |
| B9I  | <i>Cyclocardia (Arcturellina) sulcata aizyensis</i> |    |       | <b>2.22</b> | 0.01 | <b>-2.77</b> | 0.02 |
| B9I  | <i>Cyclocardia (Arcturellina) sulcata aizyensis</i> |    |       | <b>2.05</b> | 0.04 | <b>-2.74</b> | 0.06 |
| B9J  | <i>Cyclocardia (Arcturellina) sulcata aizyensis</i> |    |       | <b>2.22</b> | 0.02 | <b>-3.18</b> | 0.02 |
